# Supplementary material for: Tailoring the photo-Fenton activity of spinel ferrites (MFe2O4) by incorporating different cations (M = Cu, Zn, Ni and Co) in the structure
Source: Royal Society of Chemistry journal article supplement (doi:10.1039/c4ra13692f), 2014-12-08
Supplement: c4ra13692f1.pdf [file c4ra13692f1.pdf]

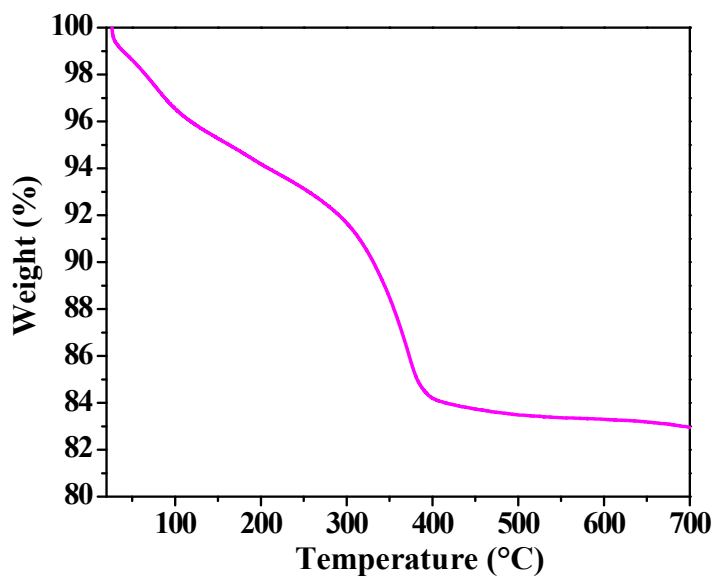

**Fig. SF1 TGA curve of as obtained NiFe<sub>2</sub>O<sub>4</sub>**

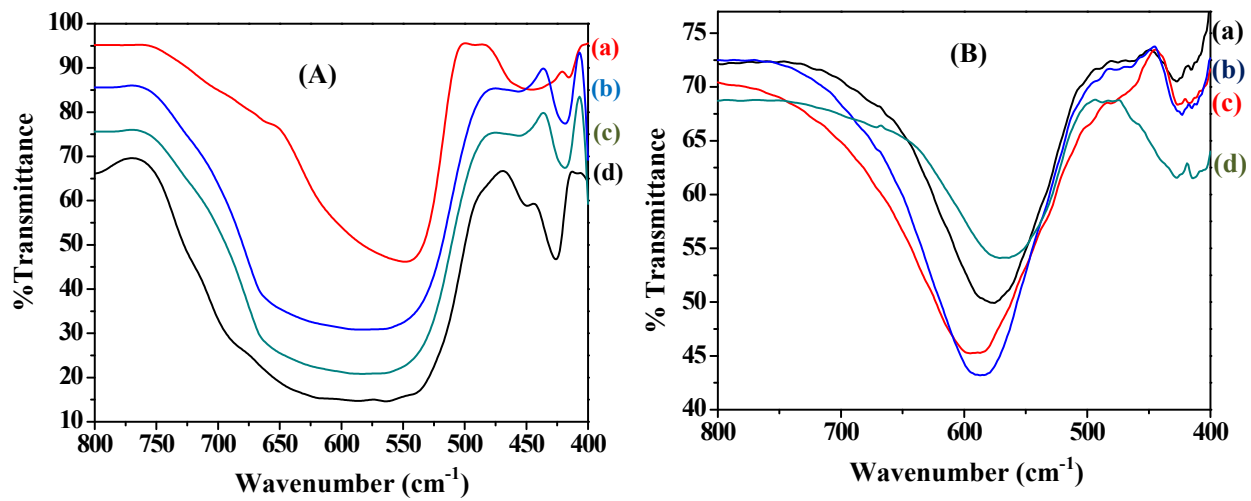

**Fig. SF2 FTIR Spectra of (a) ZnFe<sub>2</sub>O<sub>4</sub> (b) NiFe<sub>2</sub>O<sub>4</sub> (c) CoFe<sub>2</sub>O<sub>4</sub> and (d) CuFe<sub>2</sub>O<sub>4</sub> annealed at (A) 400 °C and (B) 1000 °C.**

**Table ST1 Different parameters of MFe<sub>2</sub>O<sub>4</sub> (M= Co, Ni, Cu and Zn) annealed at 400 °C**

| <b>Ferrite</b>                       | <b>D<sub>TEM</sub><br/>(nm)</b> | <b>Crystallite<br/>size (nm)</b> | <b>Lattice<br/>Parameter (Å)</b> | <b>E<sub>g</sub> (eV)</b> | <b>M<sub>s</sub><br/>(emu/g)</b> | <b>H<sub>c</sub> (Oe)</b> |
|--------------------------------------|---------------------------------|----------------------------------|----------------------------------|---------------------------|----------------------------------|---------------------------|
| <b>CoFe<sub>2</sub>O<sub>4</sub></b> | 20                              | 25.80                            | 8.388                            | 1.26                      | 65                               | 1150                      |
| <b>NiFe<sub>2</sub>O<sub>4</sub></b> | 25                              | 26.12                            | 8.350                            | 2.08                      | 19                               | 70                        |
| <b>CuFe<sub>2</sub>O<sub>4</sub></b> | 15                              | 17.51                            | 8.381                            | 1.38                      | 60                               | 300                       |
| <b>ZnFe<sub>2</sub>O<sub>4</sub></b> | 30                              | 30.06                            | 8.442                            | 1.94                      | 6                                | 25                        |

### Calculus of BET surface area analysis

The unique values of  $Q_m$  and  $C$  which were estimated from slope ( $A$ ) and intercept ( $I$ ) of BET plots can be calculated according to following equations:

$$Q_m = \frac{1}{A + I} \quad (1)$$

$$C = 1 + \frac{A}{I} \quad (2)$$

In addition, total surface area and specific surface area were obtained using following equations:

$$S_{total} = \frac{Q_m N_s}{V} \quad (3)$$

$$S_{BET} = \frac{S_{total}}{M} \quad (4)$$

where  $N$  is Avogadro's number,  $s$  ( $0.1620 \text{ nm}^2$ ) is the molecular cross-sectional area,  $V$  is the molar volume of the adsorbate gas and  $M$  is the mass of the adsorbent sample.
